# Supplementary material for: Construction of NiIILnIIIMIII (Ln = GdIII, TbIII; M = FeIII, CrIII) clusters showing slow magnetic relaxations
Source: Royal Society of Chemistry journal article supplement (doi:10.1039/c5dt03620h), 2015-01-01
Supplement: c5dt03620h1.pdf [file c5dt03620h1.pdf]

## Electronic Supplementary Information

### Construction of $\text{Ni}^{\text{II}}\text{Ln}^{\text{III}}\text{M}^{\text{III}}$ ( $\text{Ln} = \text{Gd}^{\text{III}}, \text{Tb}^{\text{III}}$ ; $\text{M} = \text{Fe}^{\text{III}}, \text{Cr}^{\text{III}}$ ) Clusters Showing Slow Magnetic Relaxations

Chao Chen,<sup>a</sup> Yashu Liu,<sup>b</sup> Ping Li,<sup>a</sup> Hongbo Zhou<sup>a</sup> and Xiaoping Shen<sup>\*a</sup>

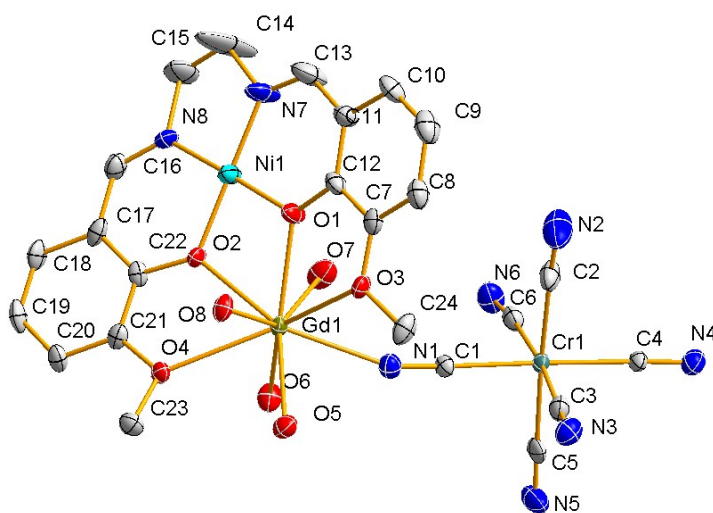

(a)

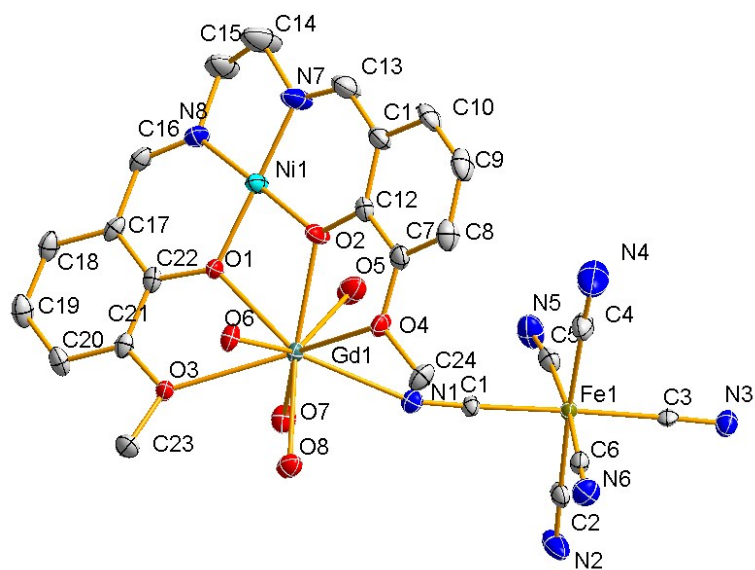

(b)

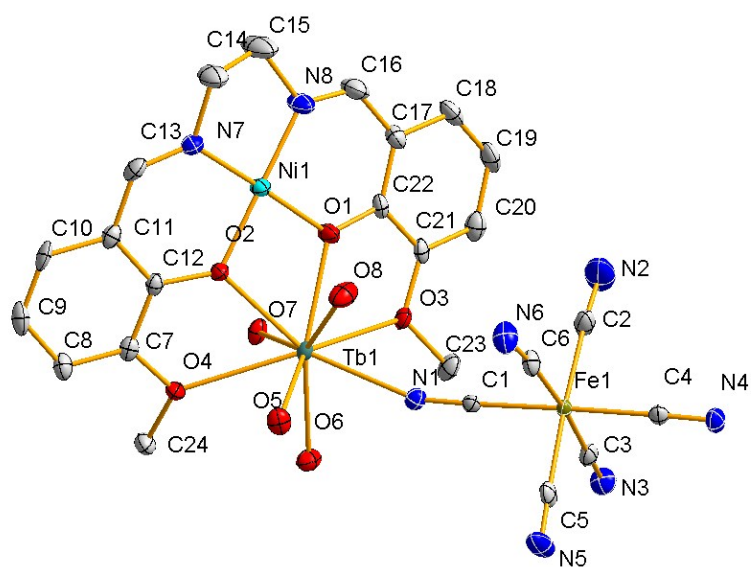

(c)

Figure S1 ORTEP (30%) diagrams of asymmetric units with selected atom-labeling schemes for complex 2(a), 3(b) and 4(c).

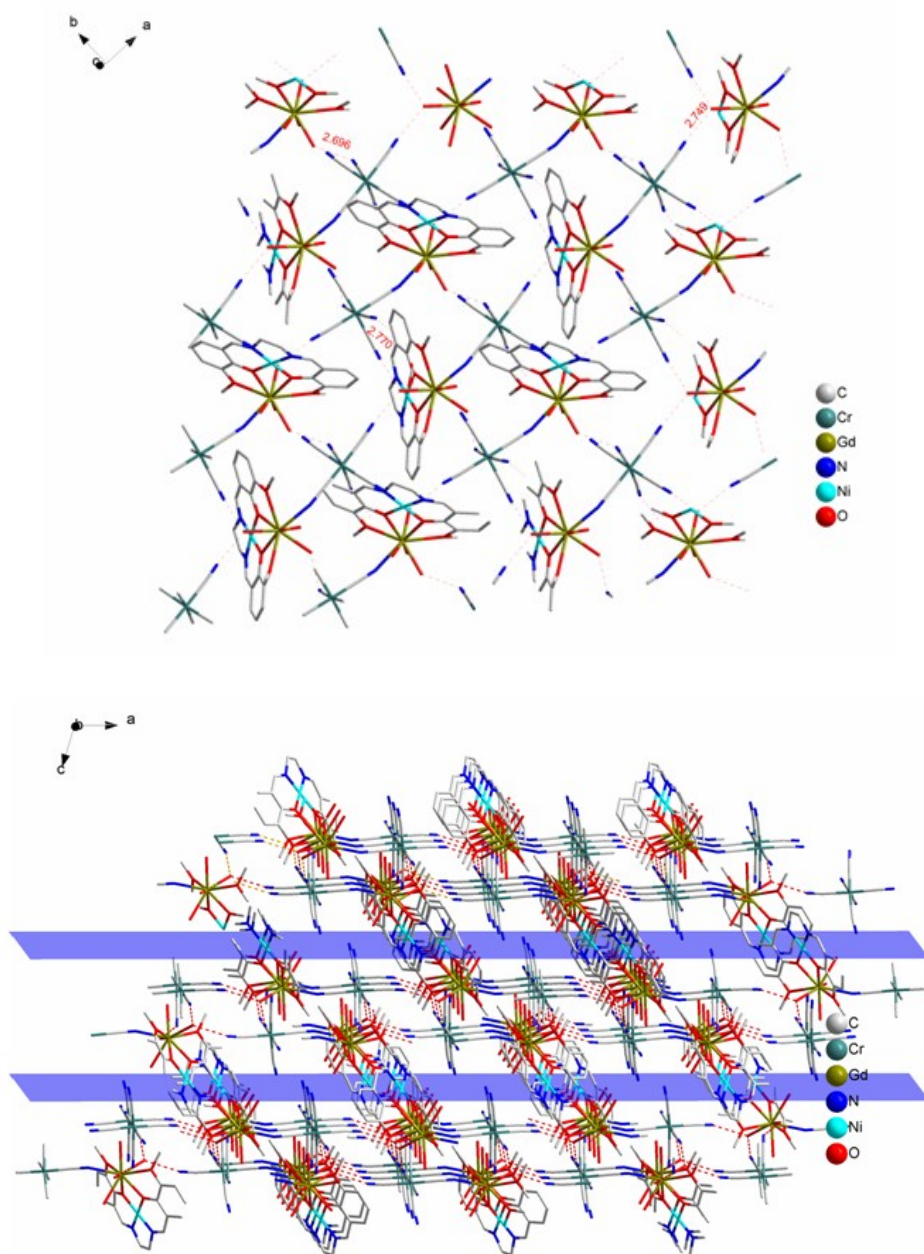

(a)

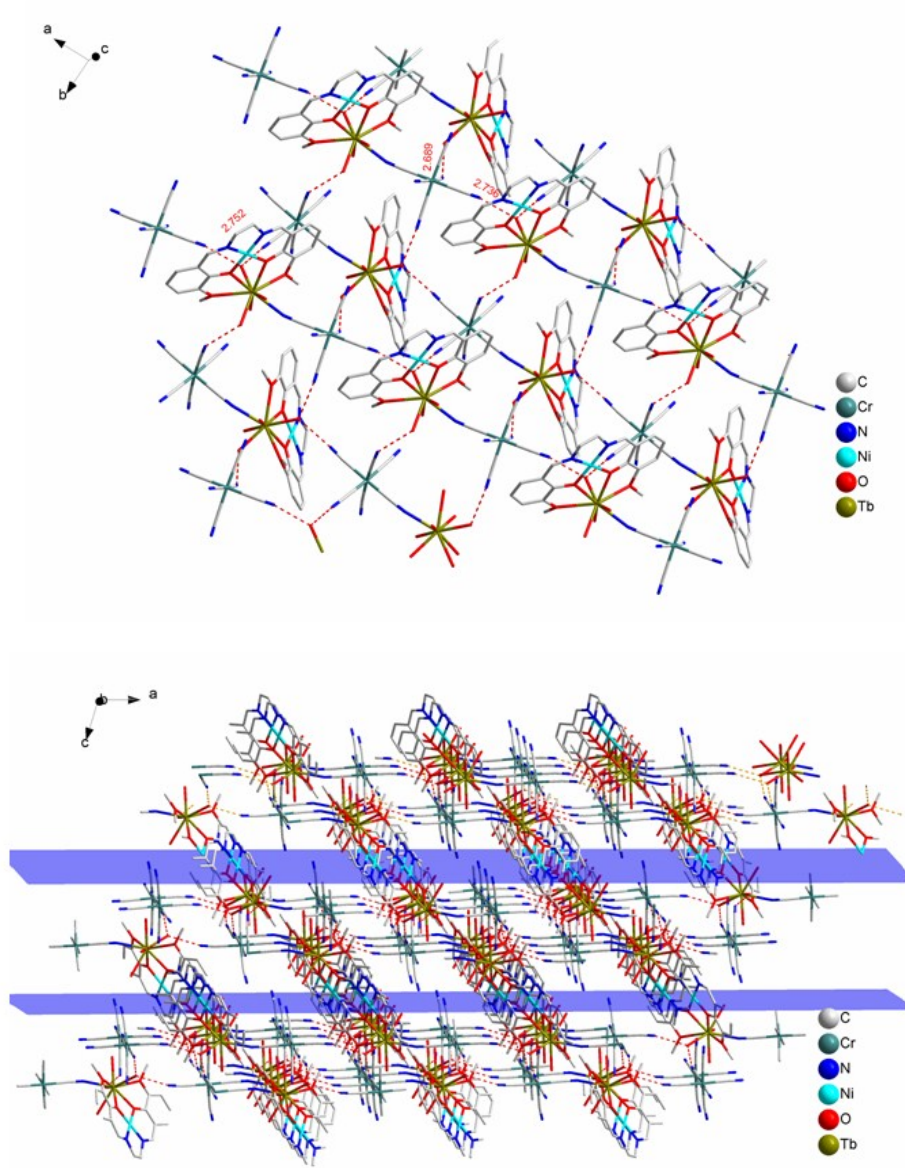

(b)

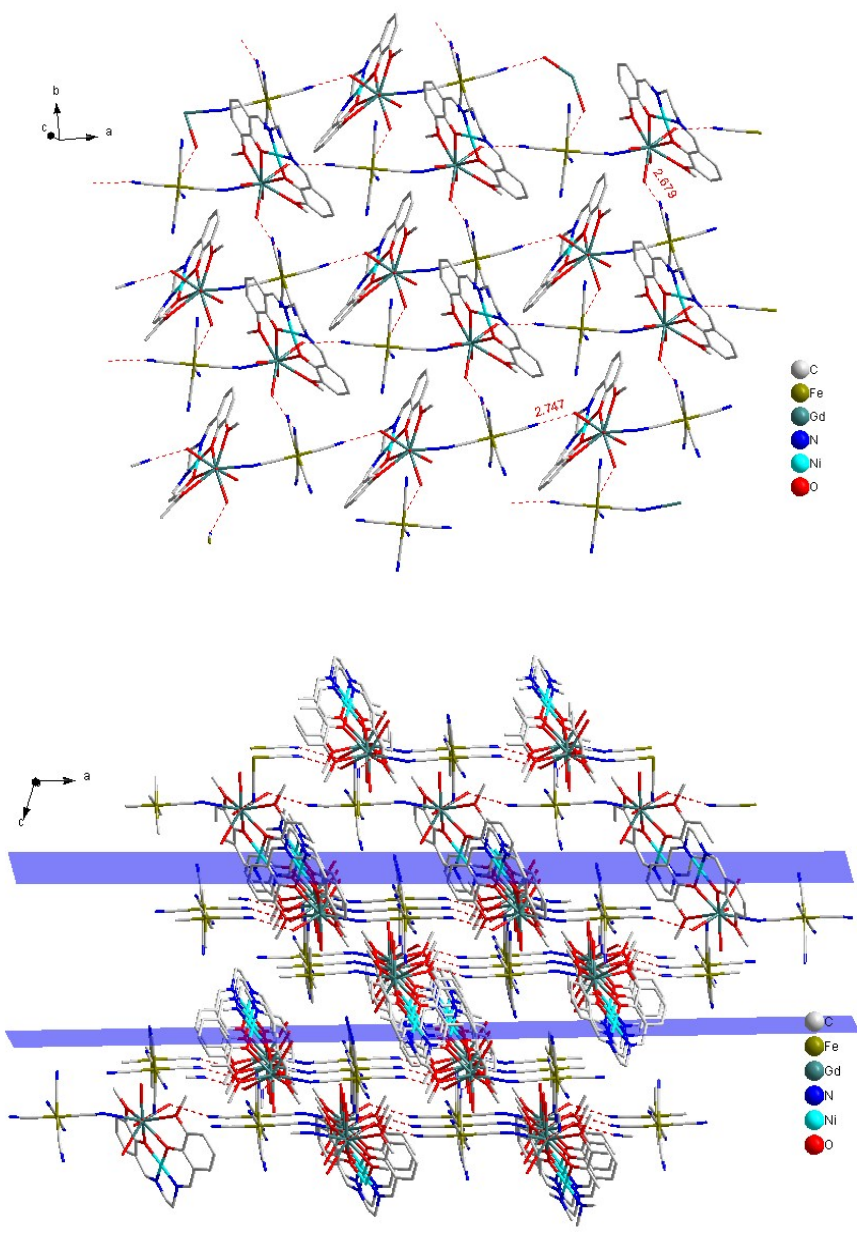

(c)



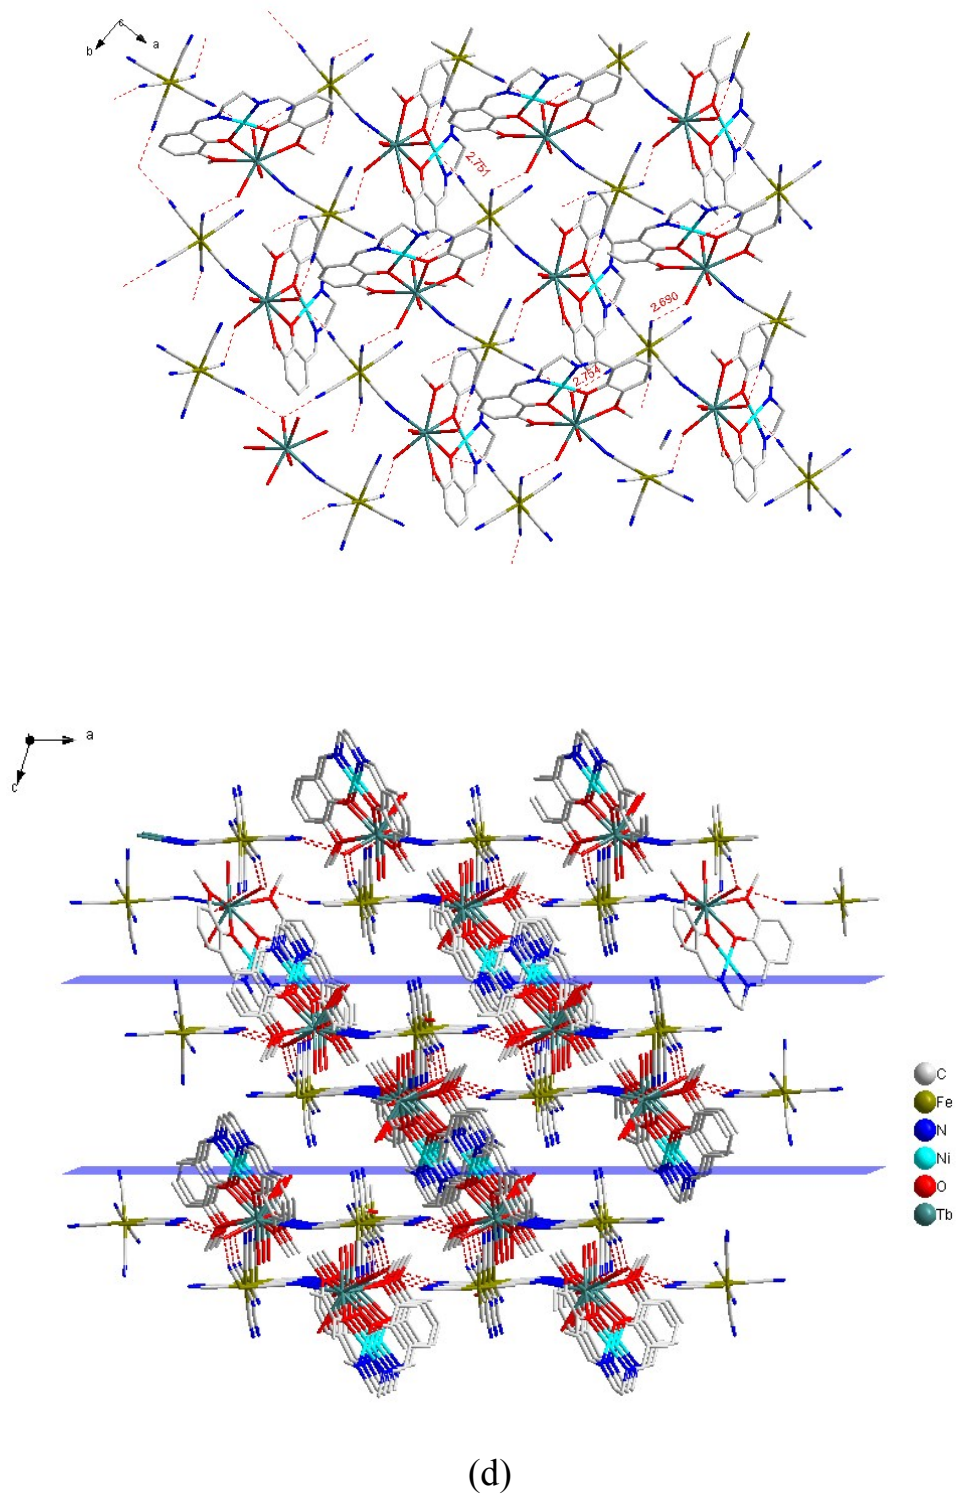

Figure S2 The extended molecular structures of complex 1(a), 2(b), 3(c) and 4(d).

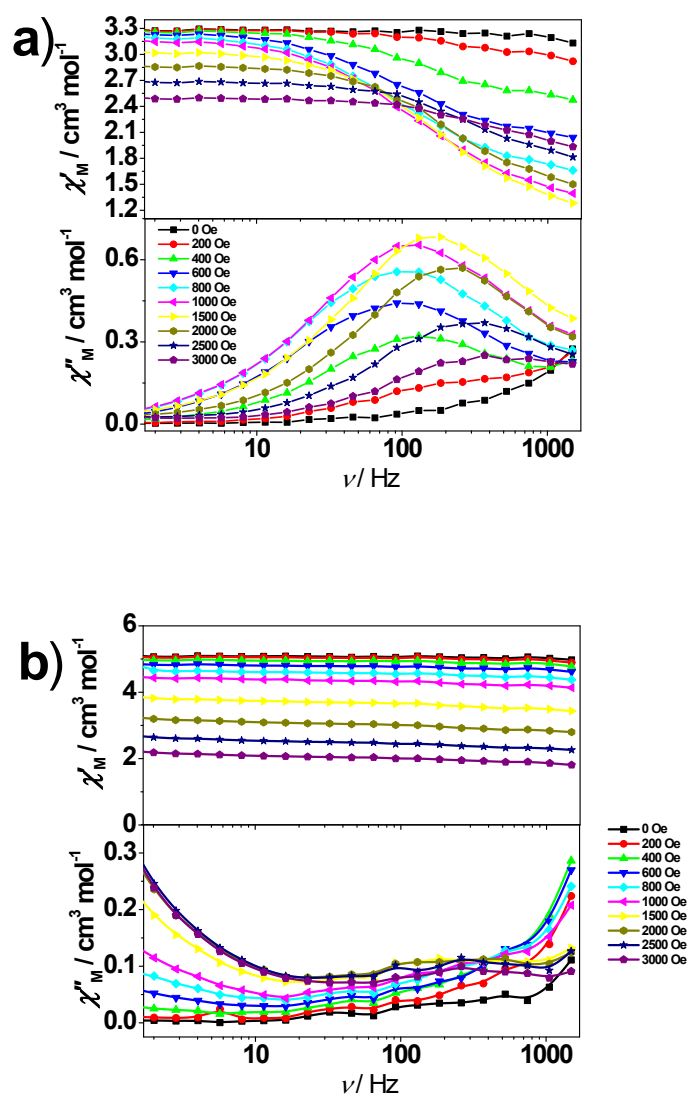

Figure S3 Field dependence of the in-phase ( $\chi_M'$ ) and out-of-phase ( $\chi_M''$ ) *ac* susceptibilities of **2**(a) and **4**(b) in different *dc* field and 3 Oe *ac* field at 1.8 K (Solid lines are guides for the eyes).

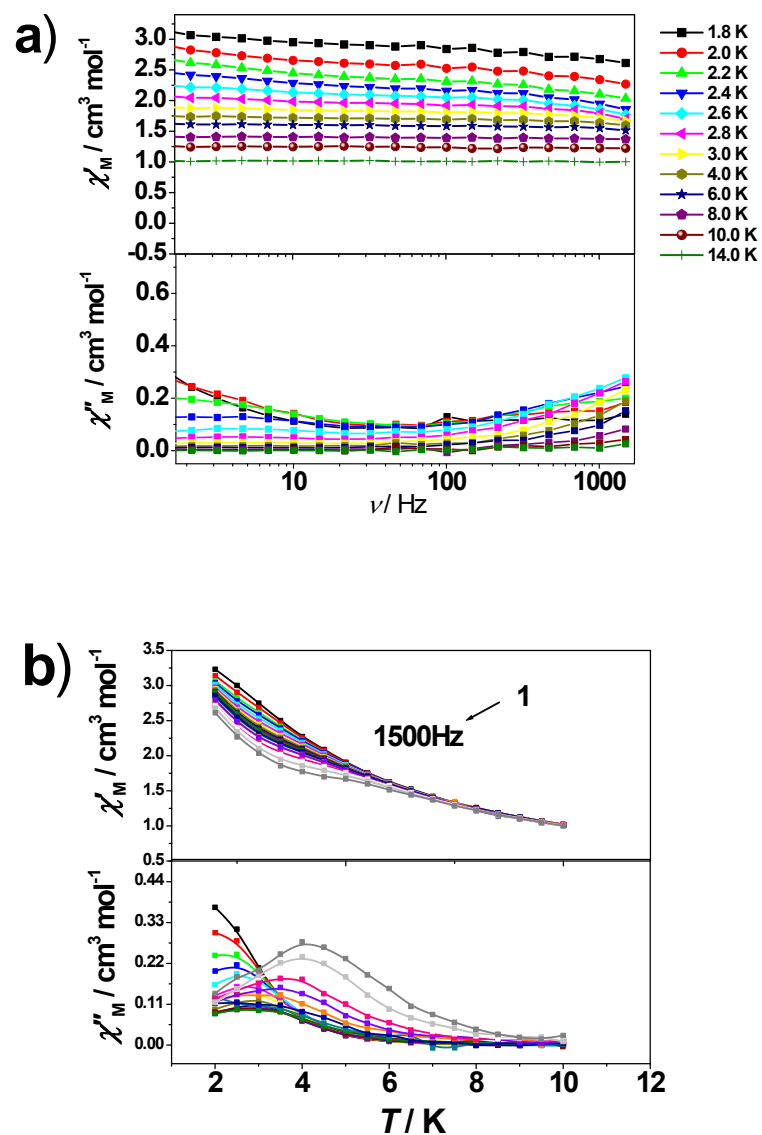

Figure S4 Frequency (a) and temperature (b) dependence of the in-phase ( $\chi_M'$ ) and out-of-phase ( $\chi_M''$ ) ac susceptibilities of 4 in 2000 Oe *dc* field and 3 Oe *ac* field (Solid lines are guides for the eyes).



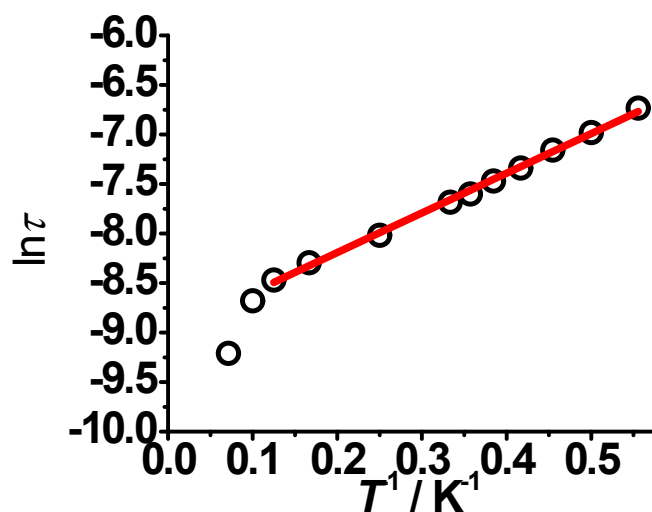

Figure. S5 The fitting of the relaxation time ( $\tau$ ) using Arrhenius law for complex 2

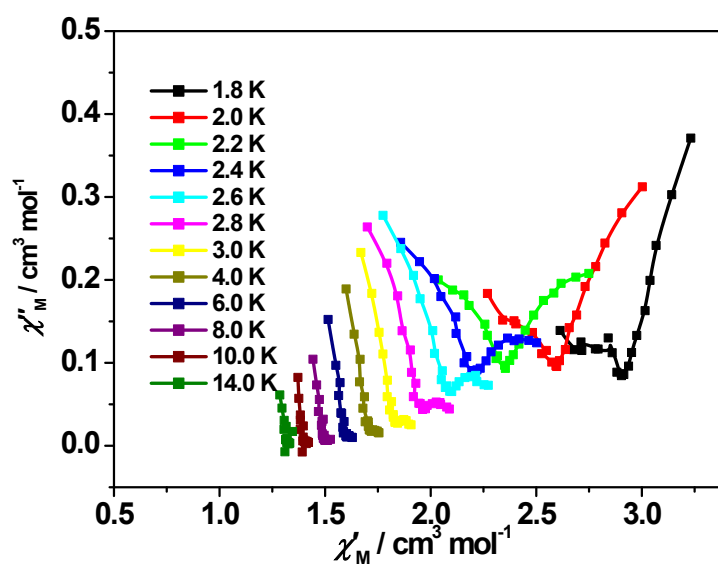

Figure. S6 The Cole-Cole plots of complex 4 measured under 2 kOe *dc* field and 3 Oe *ac* field. (Solid lines are guides for the eyes)

Table S1. Selected bond lengths [ $\text{\AA}$ ] and angles [ $\text{deg}^\circ$ ] for 1-4.

| 1      | 2        | 3      | 4        |        |          |        |          |
|--------|----------|--------|----------|--------|----------|--------|----------|
| C1-Cr1 | 2.063(6) | C1-Cr1 | 2.066(4) | C1-Fe1 | 1.930(4) | C1-Fe1 | 1.931(4) |
| C2-Cr1 | 2.076(7) | C2-Cr1 | 2.079(5) | C2-Fe1 | 1.936(4) | C2-Fe1 | 1.953(5) |
| C3-Cr1 | 2.045(7) | C3-Cr1 | 2.070(5) | C3-Fe1 | 1.937(4) | C3-Fe1 | 1.922(4) |
| C4-Cr1 | 2.052(6) | C4-Cr1 | 2.057(5) | C4-Fe1 | 1.949(5) | C4-Fe1 | 1.945(4) |
| C5-Cr1 | 2.060(7) | C5-Cr1 | 2.069(5) | C5-Fe1 | 1.934(4) | C5-Fe1 | 1.942(5) |
| C6-Cr1 | 2.080(7) | C6-Cr1 | 2.058(4) | C6-Fe1 | 1.924(5) | C6-Fe1 | 1.940(4) |

|           |            |           |            |           |            |           |            |
|-----------|------------|-----------|------------|-----------|------------|-----------|------------|
| Gd1-O8    | 2.359(4)   | N1-Tb1    | 2.475(4)   | Gd1-O1    | 2.364(3)   | N1-Tb1    | 2.486(3)   |
| Gd1-O1    | 2.372(4)   | N7-Ni1    | 1.830(4)   | Gd1-O6    | 2.371(3)   | N7-Ni1    | 1.844(4)   |
| Gd1-O6    | 2.374(4)   | N8-Ni1    | 1.838(4)   | Gd1-O7    | 2.375(3)   | N8-Ni1    | 1.840(4)   |
| Gd1-O2    | 2.374(4)   | Ni1-O2    | 1.845(3)   | Gd1-O2    | 2.378(3)   | Ni1-O2    | 1.848(3)   |
| Gd1-O5    | 2.423(4)   | Ni1-O1    | 1.851(3)   | Gd1-O8    | 2.425(3)   | Ni1-O1    | 1.850(3)   |
| Gd1-N1    | 2.496(5)   | Ni1-Tb1   | 3.3706(12) | Gd1-N1    | 2.489(4)   | Ni1-Tb1   | 3.3861(12) |
| Gd1-O7    | 2.520(4)   | O1-Tb1    | 2.357(3)   | Gd1-O5    | 2.521(3)   | O1-Tb1    | 2.378(3)   |
| Gd1-O3    | 2.607(4)   | O2-Tb1    | 2.355(3)   | Gd1-O4    | 2.598(3)   | O2-Tb1    | 2.366(3)   |
| Gd1-O4    | 2.656(4)   | O3-Tb1    | 2.663(3)   | Gd1-O3    | 2.664(3)   | O3-Tb1    | 2.598(3)   |
| Gd1-Ni1   | 3.3890(13) | O4-Tb1    | 2.608(3)   | Gd1-Ni1   | 3.3864(12) | O4-Tb1    | 2.668(3)   |
| N7-Ni1    | 1.833(6)   | O5-Tb1    | 2.403(3)   | N7-Ni1    | 1.841(4)   | O5-Tb1    | 2.369(3)   |
| N8-Ni1    | 1.836(5)   | O6-Tb1    | 2.335(3)   | N8-Ni1    | 1.833(4)   | O6-Tb1    | 2.423(3)   |
| Ni1-O2    | 1.845(4)   | O7-Tb1    | 2.355(3)   | Ni1-O2    | 1.844(3)   | O7-Tb1    | 2.372(3)   |
| Ni1-O1    | 1.852(4)   | O8-Tb1    | 2.516(3)   | Ni1-O1    | 1.850(3)   | O8-Tb1    | 2.528(3)   |
| N1-C1-Cr1 | 177.7(5)   | N1-C1-Cr1 | 176.6(4)   | N1-C1-Fe1 | 177.9(4)   | N1-C1-Fe1 | 177.9(4)   |
| N2-C2-Cr1 | 175.7(7)   | N2-C2-Cr1 | 176.2(6)   | N2-C2-Fe1 | 178.9(4)   | N2-C2-Fe1 | 175.9(5)   |
| N3-C3-Cr1 | 176.8(6)   | N3-C3-Cr1 | 172.6(4)   | N3-C3-Fe1 | 175.4(4)   | N3-C3-Fe1 | 177.7(4)   |
| N4-C4-Cr1 | 174.2(6)   | N4-C4-Cr1 | 176.3(4)   | N4-C4-Fe1 | 176.5(5)   | N4-C4-Fe1 | 175.3(4)   |
| N5-C5-Cr1 | 179.1(7)   | N5-C5-Cr1 | 178.8(4)   | N5-C5-Fe1 | 173.5(4)   | N5-C5-Fe1 | 178.5(4)   |
| N6-C6-Cr1 | 172.5(6)   | N6-C6-Cr1 | 174.0(4)   | N6-C6-Fe1 | 177.5(4)   | N6-C6-Fe1 | 173.7(4)   |
| C1-N1-Gd1 | 160.6(5)   | C1-N1-Tb1 | 162.9(3)   | C1-N1-Gd1 | 162.1(3)   | C1-N1-Tb1 | 162.3(3)   |

**Fit of Cole-Cole plots.** The derivation of Debye model mentioned in the text is applied and displayed here:

$$\chi'(\omega) = \beta \left( \chi_s + \frac{(\chi_T - \chi_s)[1 + (\omega\tau_1)^{1-\alpha_1} \sin^{1/2} \alpha_1 \pi]}{1 + 2(\omega\tau_1)^{1-\alpha_1} \sin^{1/2} \alpha_1 \pi + (\omega\tau_1)^{2(1-\alpha_1)}} \right) + (1-\beta) \left( \chi_s + \frac{(\chi_T - \chi_s)[1 + (\omega\tau_2)^{1-\alpha_2} \sin^{1/2} \alpha_2 \pi]}{1 + 2(\omega\tau_2)^{1-\alpha_2} \sin^{1/2} \alpha_2 \pi + (\omega\tau_2)^{2(1-\alpha_2)}} \right)$$

$$\chi''(\omega) = \beta \left( \frac{(\chi_T - \chi_s)(\omega\tau_1)^{1-\alpha_1} \cos^{1/2} \alpha_1 \pi}{1 + 2(\omega\tau_1)^{1-\alpha_1} \sin^{1/2} \alpha_1 \pi + (\omega\tau_1)^{2(1-\alpha_1)}} \right) + (1-\beta) \left( \frac{(\chi_T - \chi_s)(\omega\tau_2)^{1-\alpha_2} \cos^{1/2} \alpha_2 \pi}{1 + 2(\omega\tau_2)^{1-\alpha_2} \sin^{1/2} \alpha_2 \pi + (\omega\tau_2)^{2(1-\alpha_2)}} \right)$$

Table S2 Parameters in double magnetic relaxations for complex 2

| $T / \text{K}$ | $\alpha$   |            | $\tau$   |          | $\chi$   |          | $\beta$ |
|----------------|------------|------------|----------|----------|----------|----------|---------|
|                | $\alpha_1$ | $\alpha_2$ | $\tau_1$ | $\tau_2$ | $\chi_T$ | $\chi_s$ |         |
| 1.8            | 0.14       | 0.11       | 0.002    | 0.00033  | 1.3      | 3.2      | 0.66    |
| 2.0            | 0.11       | 0.13       | 0.00028  | 0.00156  | 1.8      | 3.0      | 0.35    |
| 2.2            | 0.09       | 0.13       | 0.00027  | 0.00133  | 1.1      | 2.9      | 0.37    |
| 2.4            | 0.13       | 0.08       | 0.00111  | 0.00023  | 1.1      | 2.7      | 0.62    |
| 2.6            | 0.13       | 0.1        | 0.00106  | 0.00024  | 1.0      | 2.6      | 0.55    |
| 2.8            | 0.13       | 0.09       | 0.00087  | 0.00021  | 1.0      | 2.5      | 0.60    |
| 3.0            | 0.13       | 0.05       | 0.00079  | 0.00018  | 0.96     | 2.36     | 0.6     |
| 4.0            | 0.13       | 0.095      | 0.00063  | 0.00017  | 0.79     | 1.97     | 0.5     |
| 6.0            | 0.13       | 0.07       | 0.00051  | 0.00013  | 0.61     | 1.48     | 0.46    |

|      |       |      |         |         |      |      |      |
|------|-------|------|---------|---------|------|------|------|
| 8.0  | 0.10  | 0.04 | 0.00041 | 0.0001  | 0.48 | 1.18 | 0.50 |
| 10.0 | 0.10  | 0.08 | 0.00052 | 0.00013 | 0.42 | 0.98 | 0.21 |
| 14.0 | 0.001 | 0.05 | 0.00076 | 0.0001  | 0.32 | 0.73 | 0.07 |
